# Supplementary material
Source: Springer Nature journal article supplement (https://www.springermedizin.de/resource/supplementary/12985_2011_2206_MOESM1_ESM.pdf/9606292)

(a)

## CXCL5 VALUE IN RESPONSE TO PEG-INTRON

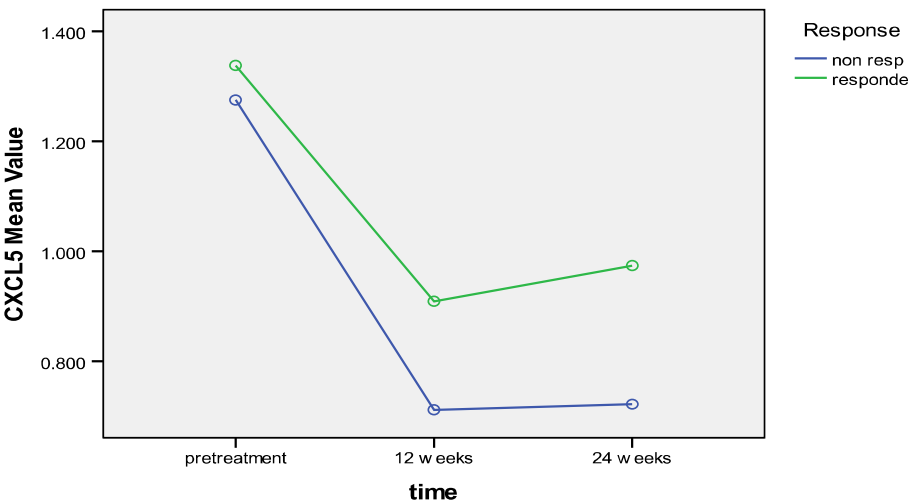

(b)

## CXCL5 Mean Value in response to (pegasys)treatment

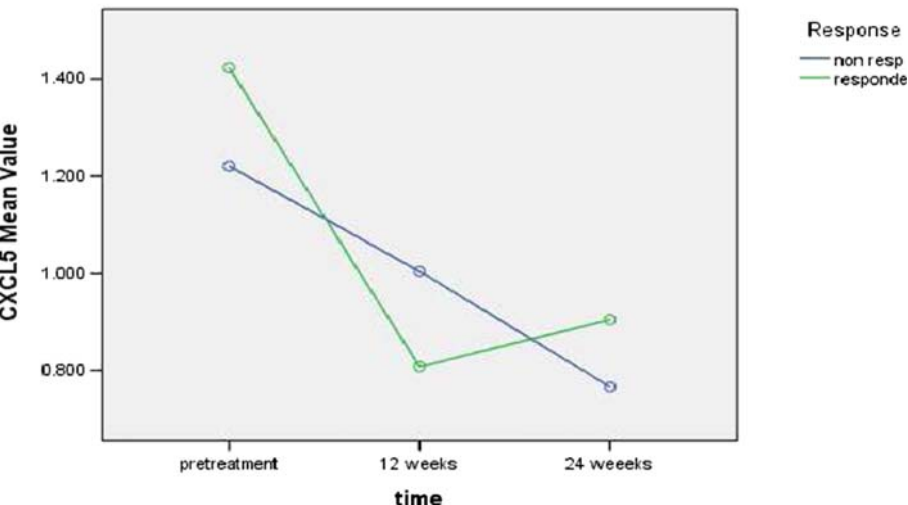

Supplement: MOESM1 [file 9606292]
